# Supplementary material for: The Influence of Vinification Methods and Cultivars on the Volatile and Phenolic Profiles of Fermented Alcoholic Beverages from Cranberry
Source: PubMed Central journal article supplement (PMC6562399; doi:10.3390/antiox8050144), 2019-05-23
Supplement: antioxidants-08-00144-s001.pdf [file antioxidants-08-00144-s001.pdf]

## Supplementary Materials

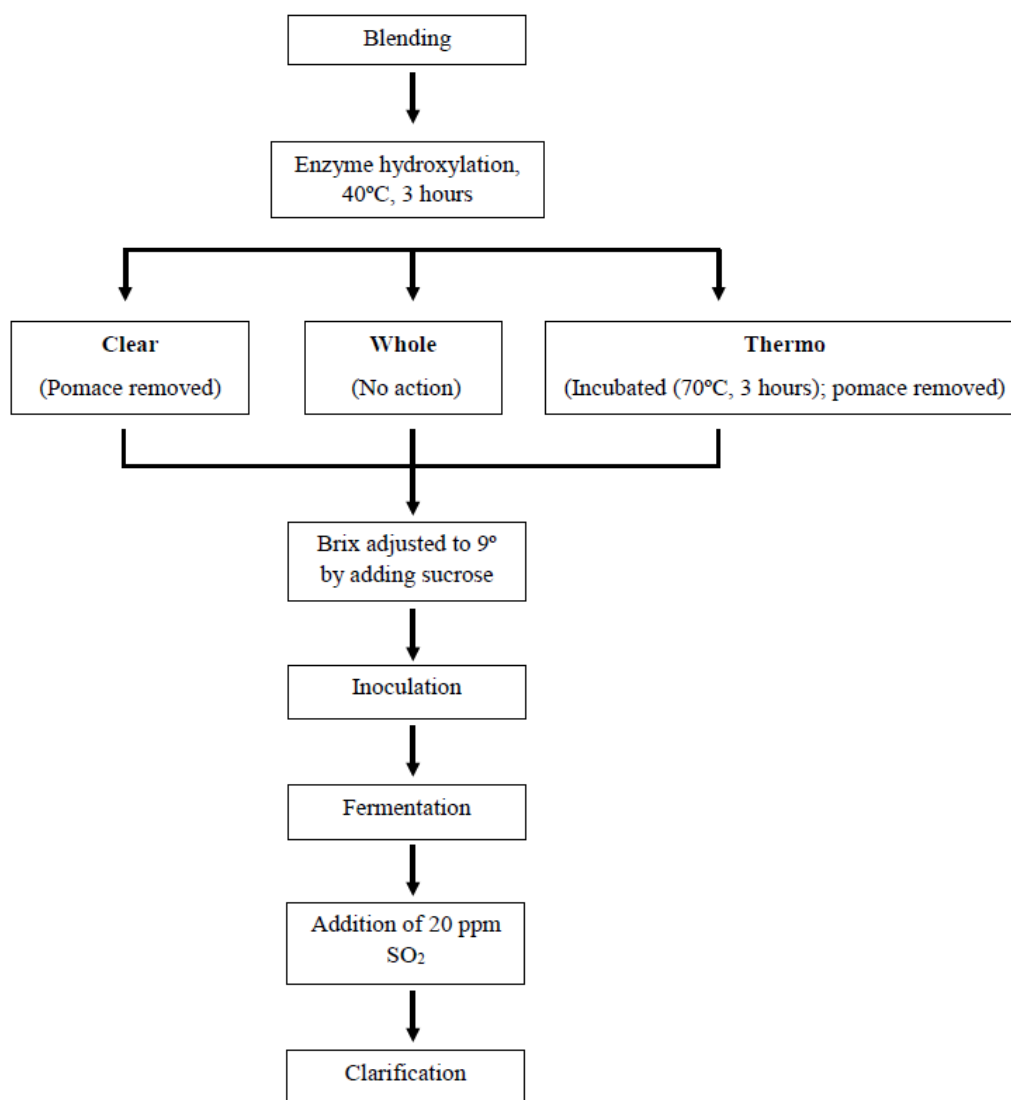

**Figure S1.** Flowchart of cranberry wine fermentation.

**Table S1.** List of Multiple Reaction Monitoring (MRM) parameters for identification of phenolic acids, flavonols, and proanthocyanins in cranberry wines.

| No. | Compounds                | Retention Time (min) | <i>m/z</i> Precursor ion (Th) | <i>m/z</i> Quantifier ion (Th) | Energy (V) | <i>m/z</i> Qualifier ion (Th) | Energy (V) |
|-----|--------------------------|----------------------|-------------------------------|--------------------------------|------------|-------------------------------|------------|
| 1   | Gallic acid              | 1.28                 | 169                           | 125                            | 10         | 79                            | 25         |
| 2   | Protocatechuic acid      | 2.16                 | 153                           | 109                            | 10         | 108                           | 25         |
| 3   | Procyanidin B1           | 3.51                 | 577                           | 289                            | 15         | 245                           | 15         |
| 4   | <i>m</i> -Salicylic acid | 3.72                 | 137                           | 93                             | 10         | 137                           | 0          |
| 5   | Gentisic acid            | 4.59                 | 153                           | 109                            | 10         | 108                           | 25         |
| 6   | Catechin                 | 4.68                 | 289                           | 245                            | 10         | 203                           | 15         |
| 7   | $\beta$ -Resorcylic acid | 5.09                 | 153                           | 109                            | 10         | 65                            | 15         |
| 8   | Chlorogenic acid         | 5.21                 | 353                           | 191                            | 15         | 85                            | 40         |
| 9   | Vanillic acid            | 5.44                 | 167                           | 152                            | 10         | 167                           | 0          |

|    |                            |       |     |     |    |     |    |
|----|----------------------------|-------|-----|-----|----|-----|----|
| 10 | <i>p</i> -Salicylic acid   | 5.57  | 137 | 93  | 10 | 137 | 0  |
| 11 | Caffeic acid               | 5.71  | 179 | 135 | 10 | 89  | 40 |
| 12 | Procyanidin B2             | 6.30  | 577 | 289 | 15 | 407 | 15 |
| 13 | Epicatechin                | 7.61  | 289 | 245 | 10 | 109 | 25 |
| 14 | <i>p</i> -Coumaric acid    | 8.45  | 163 | 119 | 10 | 163 | 0  |
| 15 | Myricetin-3-galactoside    | 9.86  | 479 | 316 | 20 | 271 | 40 |
| 16 | Myricetin-3-glucoside      | 10.09 | 479 | 316 | 20 | 271 | 40 |
| 17 | <i>trans</i> -Sinapic acid | 10.59 | 223 | 208 | 10 | 193 | 25 |
| 18 | Quercetin-3-galactoside    | 11.39 | 463 | 300 | 18 | 270 | 40 |
| 19 | Procyanidin A2             | 11.52 | 575 | 285 | 10 | 243 | 25 |
| 20 | Quercetin-3-rhamnoside     | 12.90 | 447 | 301 | 10 | 300 | 25 |
| 21 | Phloridzin                 | 14.76 | 435 | 167 | 30 | 123 | 40 |
| 22 | Quercetin                  | 18.68 | 301 | 151 | 20 | 179 | 10 |
| 23 | Kaempferol                 | 23.33 | 285 | 93  | 22 | 285 | 0  |
